# Supplementary material
Source: Springer Nature journal article supplement (https://www.springermedizin.de/resource/supplementary/12963_2008_70_MOESM2_ESM.pdf/9572600)

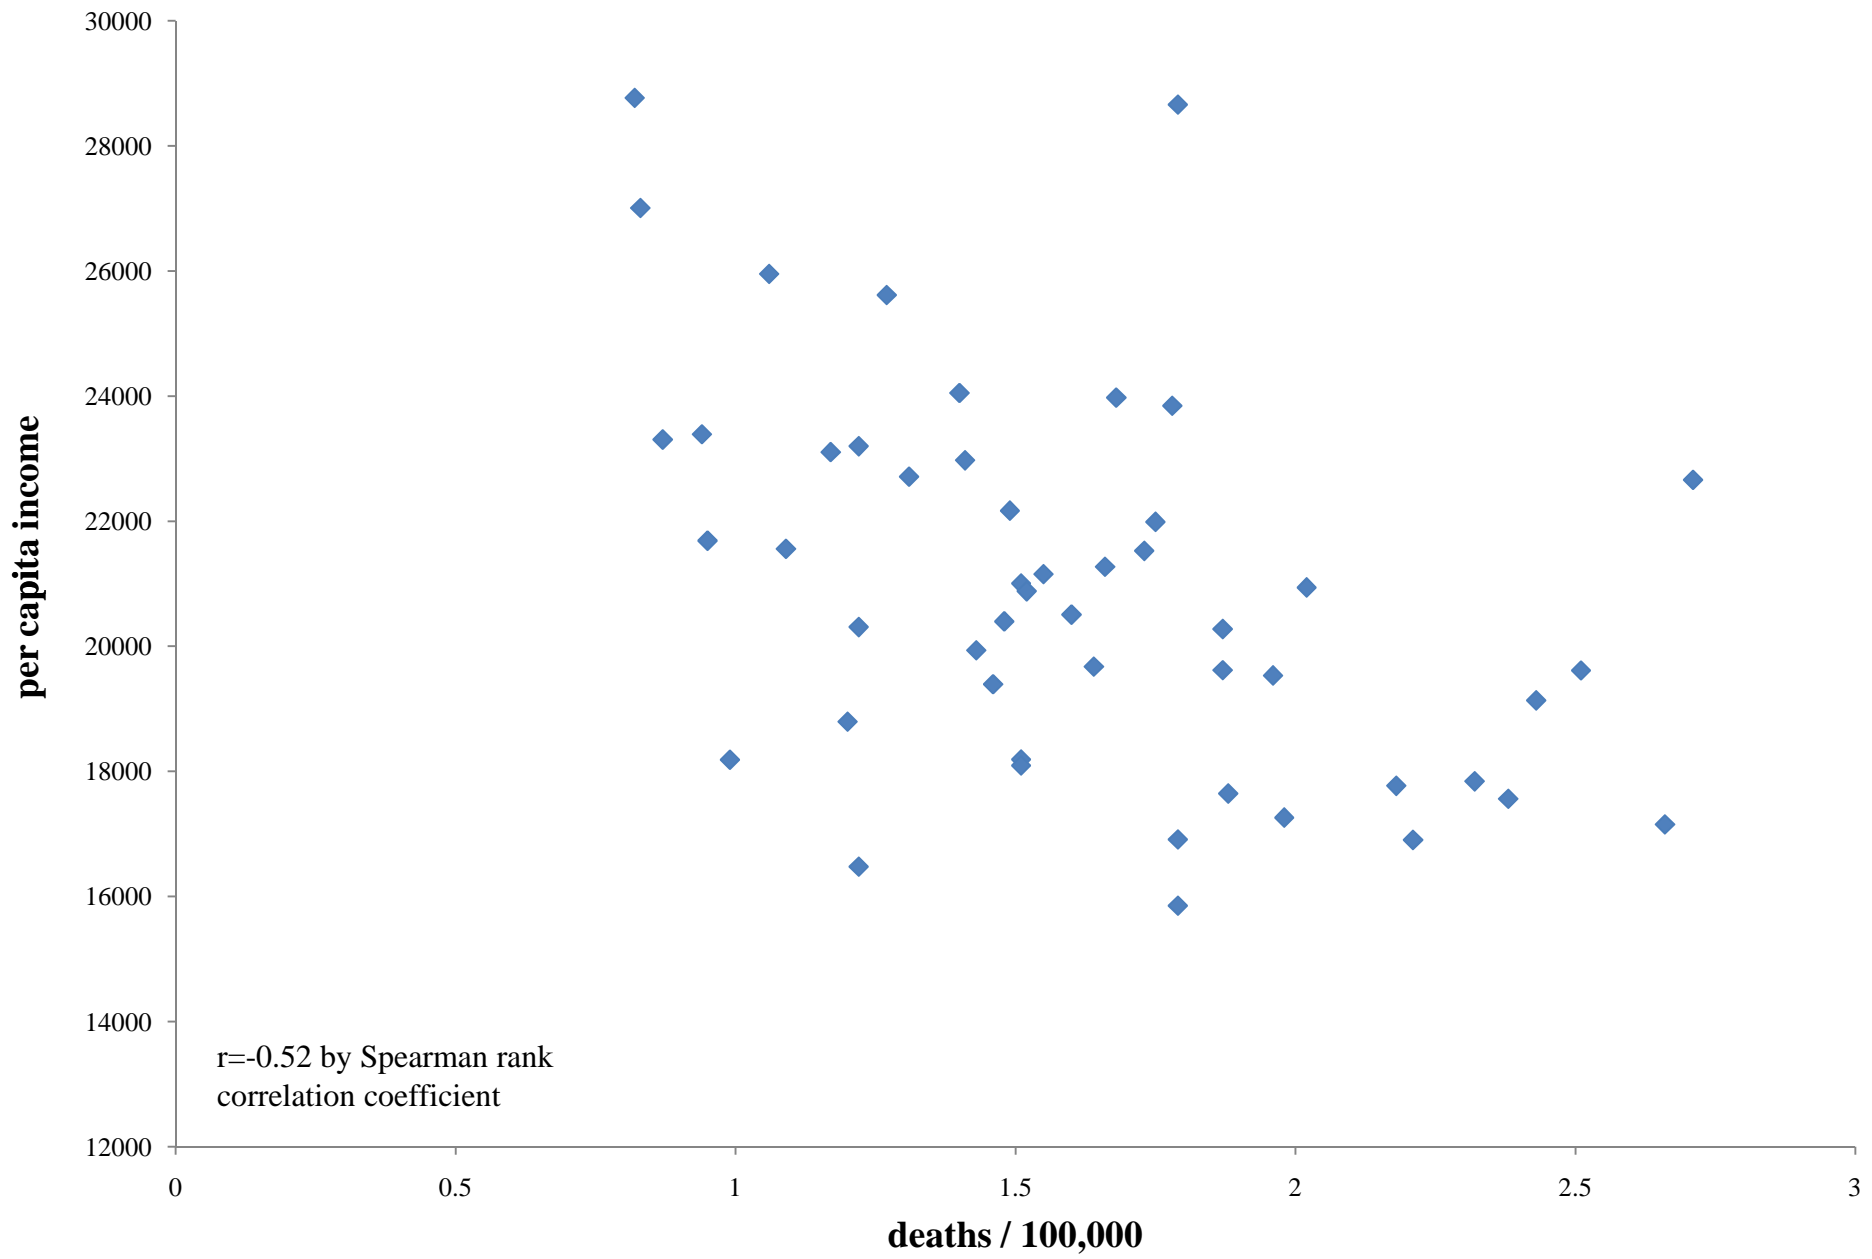

Supplement: MOESM2 [file 9572600]
